# Supplementary material for: Phase formation and ionic conduction in Na-doped Sr2MgSi2O7 melilite-type silicate
Source: Royal Society of Chemistry journal article supplement (doi:10.1039/d1ta04569e), 2021-01-01
Supplement: d1ta04569e1.pdf [file d1ta04569e1.pdf]

Supporting information for

## Phase Formation and Ionic Conduction in Na-Doped $\text{Sr}_2\text{MgSi}_2\text{O}_7$ Melilite-type Silicate

Wenda Zhang<sup>1</sup>, Jie Feng<sup>1</sup>, Fengqi Lu<sup>1</sup>, Alberto J. Fernández-Carrión<sup>1</sup>, Hui Fu<sup>2,\*</sup>, and

Xiaojun Kuang<sup>1,3,\*</sup>

1. Guangxi Key Laboratory of Optic and Electronic Materials and Devices, MOE Key Laboratory of New Processing Technology for Nonferrous Metals and Materials, College of Materials Science and Engineering, Guilin University of Technology, Guilin 541004 P. R. China
2. Beijing National Laboratory for Molecular Sciences, Analytical Instrumentation Center, College of Chemistry and Molecular Engineering, Peking University, Beijing 100871, P. R. China.
3. Guangxi Key Laboratory of Electrochemical and Magnetochemical Function Materials, College of Chemistry and Bioengineering, Guilin University of Technology, Guilin 541004, P. R. China

---

\*E-mail: kuangxj@glut.edu.cn (X.K.)

\*E-mail: fuhui@pku.edu.cn (H.F.)

**Table S1.** Final refined structural parameters of Sr<sub>1.6</sub>Na<sub>0.4</sub>MgSi<sub>2</sub>O<sub>6.8</sub>.\*

| Atom | Site | <i>x</i>   | <i>y</i>   | <i>z</i>   | Occupancy | B <sub>iso</sub> (Å <sup>2</sup> ) |
|------|------|------------|------------|------------|-----------|------------------------------------|
| Sr   | 4e   | 0.33454(4) | 0.16546(4) | 0.50837(3) | 0.984(2)  | 0.63(2)                            |
| Na   | 4e   | 0.33454(4) | 0.16546(4) | 0.50837(3) | 0.016(2)  | 0.63(2)                            |
| Mg   | 2a   | 0          | 0          | 0          | 1         | 0.65(6)                            |
| Si   | 4e   | 0.1387(1)  | 0.3613(1)  | 0.9437(2)  | 1         | 0.53(5)                            |
| O1   | 2c   | 0.5        | 0          | 0.16001(3) | 1         | 0.49(7)                            |
| O2   | 4e   | 0.1413(2)  | 0.3587(2)  | 0.2544(5)  | 1         | 0.49(7)                            |
| O3   | 8f   | 0.0809(2)  | 0.1893(2)  | 0.7996(4)  | 1         | 0.49(7)                            |

\* $a = b = 8.00087(3)$  Å,  $c = 5.169(1)$  Å,  $\alpha = \beta = \gamma = 90^\circ$ ,  $Z = 2$ ,  $V = 330.889(3)$  Å<sup>3</sup>, space group: P<sup>4</sup><sub>2</sub><sub>1</sub>m; Reliability factors are  $R_{wp} \sim 2.79\%$ ,  $R_p \sim 2.04\%$ ,  $R_B \sim 0.83\%$ .

**Table S2.** Selected interatomic bond lengths of Sr<sub>1.6</sub>Na<sub>0.4</sub>MgSi<sub>2</sub>O<sub>6.8</sub>.

| Bond            | Length (Å) | Bond        | Length (Å) |
|-----------------|------------|-------------|------------|
| Sr1/Na1-O3 (×2) | 2.534(2)   | Mg1-O3 (×4) | 1.962(2)   |
| Sr1/Na1-O2 (×1) | 2.550(3)   | Si1-O2 (×1) | 1.606(3)   |
| Sr1/Na1-O1 (×1) | 2.598(1)   | Si1-O3 (×2) | 1.632(2)   |
| Sr1/Na1-O2 (×2) | 2.750(2)   | Si1-O1 (×1) | 1.659(2)   |
| Sr1/Na1-O3 (×2) | 2.788(2)   |             |            |

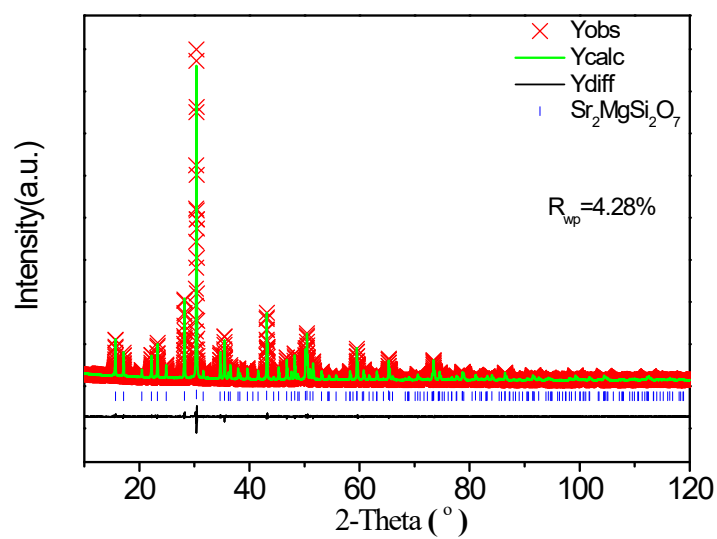

**Figure S1.** Rietveld profile of XRD data for Sr<sub>1.6</sub>Na<sub>0.4</sub>MgSi<sub>2</sub>O<sub>6.8</sub>.

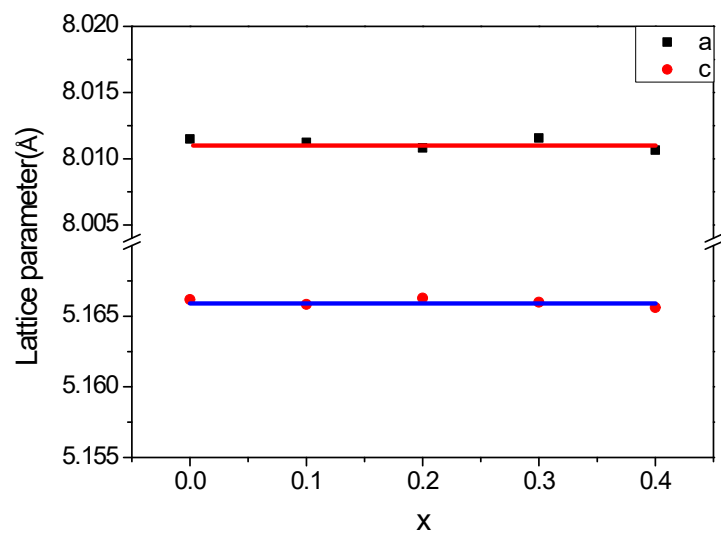

**Figure S2.** The refined cell parameters of Sr<sub>2-x</sub>Na<sub>x</sub>MgSi<sub>2</sub>O<sub>7-0.5x</sub> (x = 0-0.4).

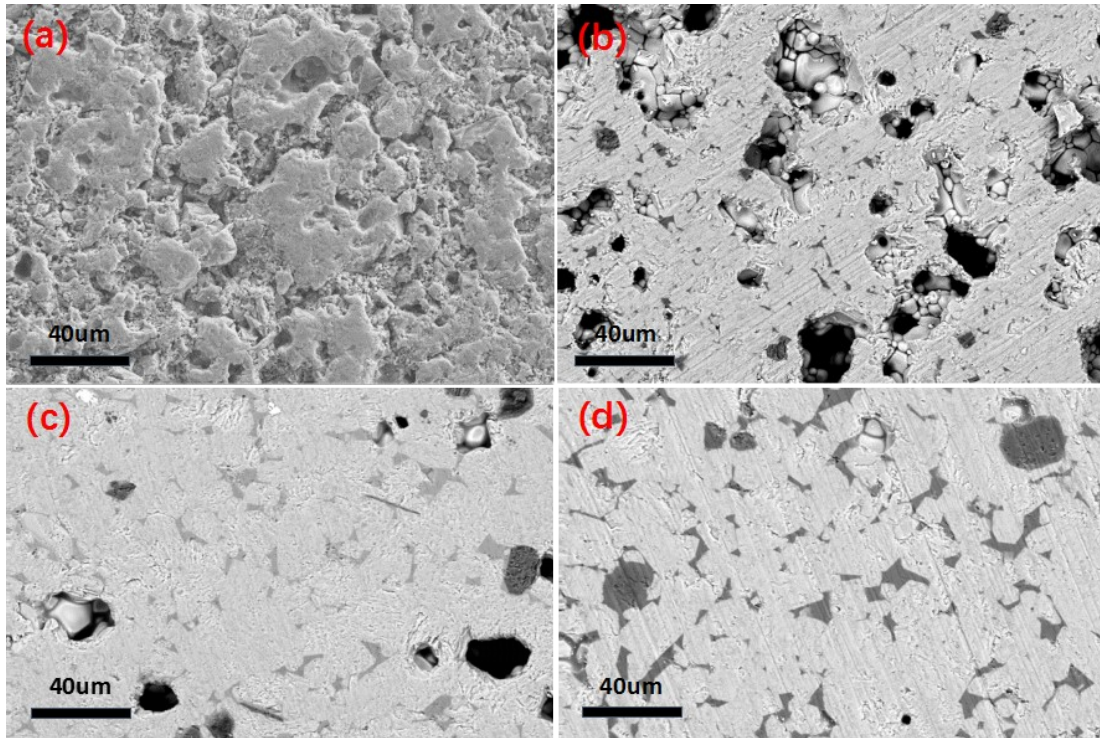

**Figure S3.** The SEM BSE images of polished surface for the (a)  $\text{Sr}_2\text{MgSi}_2\text{O}_7$ , (b)  $\text{Sr}_{1.9}\text{Na}_{0.1}\text{MgSi}_2\text{O}_{6.95}$ , (c)  $\text{Sr}_{1.8}\text{Na}_{0.2}\text{MgSi}_2\text{O}_{6.9}$  and (d)  $\text{Sr}_{1.7}\text{Na}_{0.3}\text{MgSi}_2\text{O}_{6.85}$  pellets.

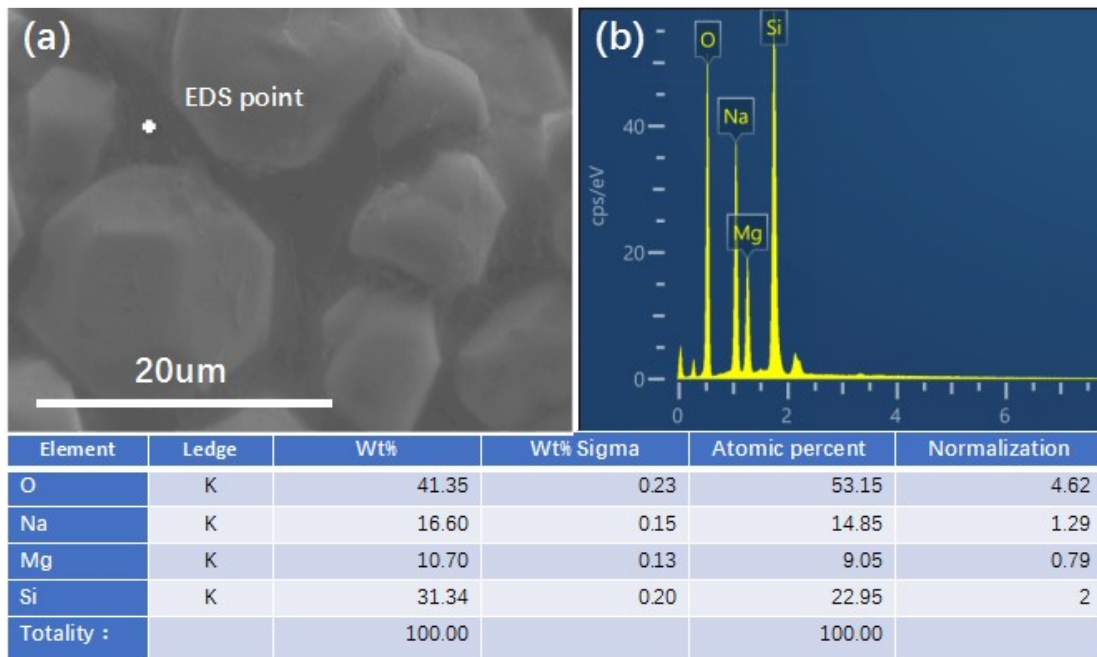

**Figure S4.** Typical SEM-EDS elemental quantitative analysis of the glassy phase in the  $\text{Sr}_{1.6}\text{Na}_{0.4}\text{MgSi}_2\text{O}_{6.8}$  pellet: (a) SEM image, (b) EDS spectrum and the table for atomic contents.

**Table S3.** The TEM-EDS element analysis results for the  $\text{Sr}_{1.6}\text{Na}_{0.4}\text{MgSi}_2\text{O}_{6.8}$  sample on the crystal shown in Figure 3c.

| Element          | Edge | Wt% Sigma | Atomic percent | Normalization |
|------------------|------|-----------|----------------|---------------|
| <b>O</b>         | K    | 31.9      | 58.0           | 6.2           |
| <b>Na</b>        | K    | 0         | 0              | 0             |
| <b>Mg</b>        | K    | 7.7       | 9.3            | 1             |
| <b>Si</b>        | K    | 17.9      | 18.6           | 2             |
| <b>Sr</b>        | K    | 42.4      | 14.1           | 1.5           |
| <b>Totality:</b> |      | 100.0     | 100.0          |               |

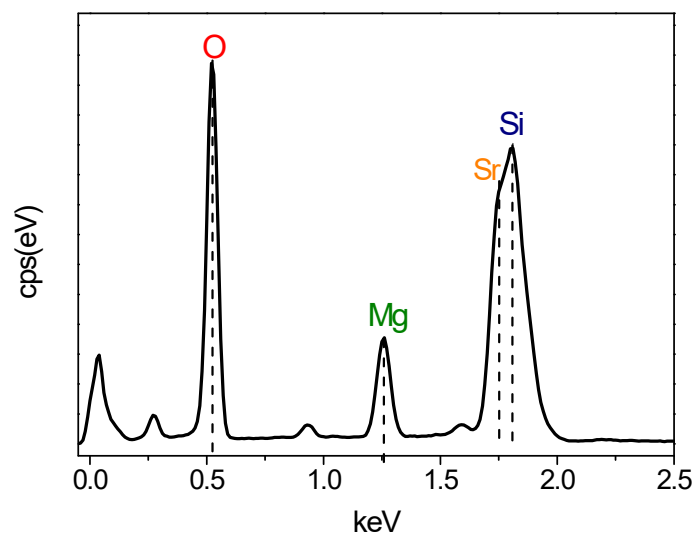

**Figure S5.** The TEM-EDS spectrum for the  $\text{Sr}_{1.6}\text{Na}_{0.4}\text{MgSi}_2\text{O}_{6.8}$  sample on the crystal shown in Figure 3c.

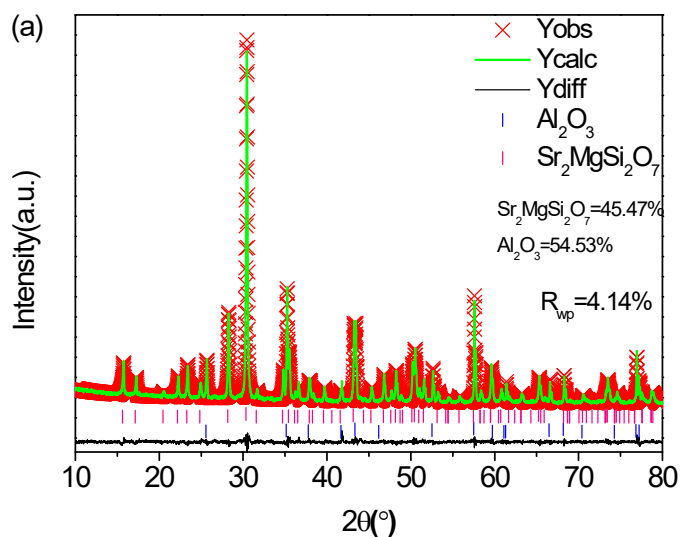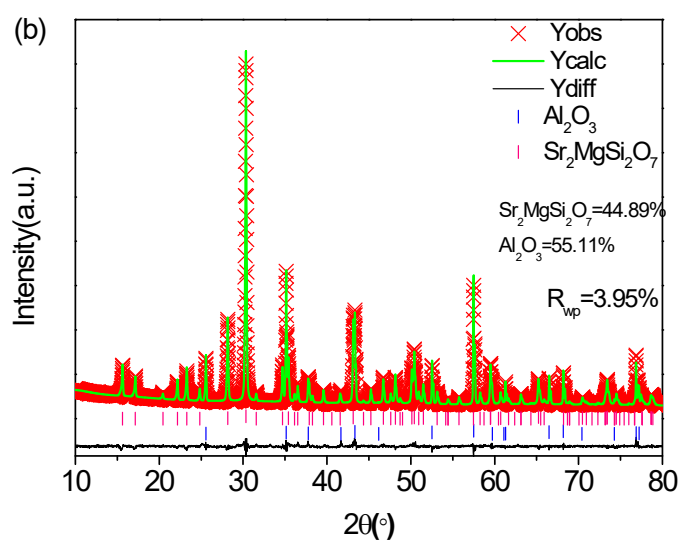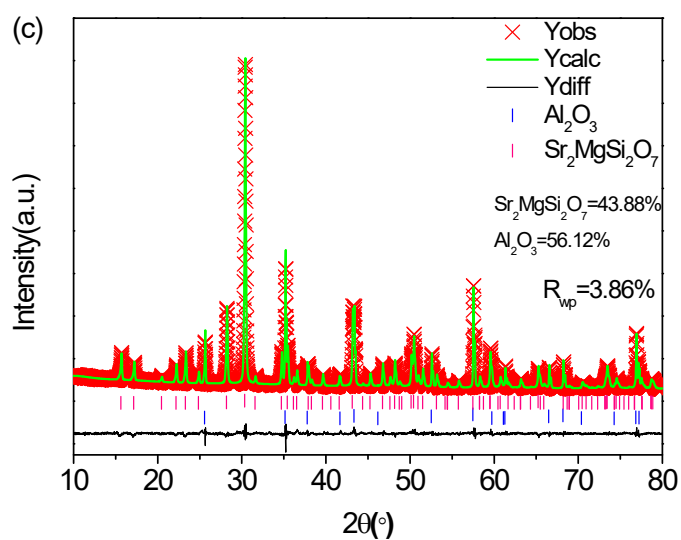

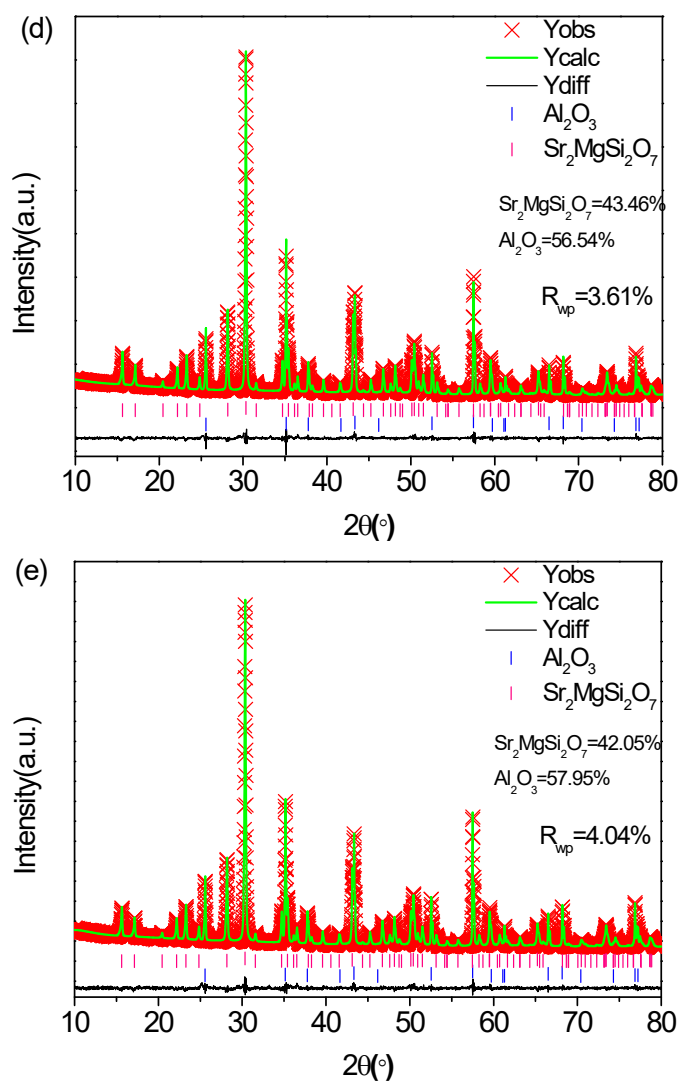

**Figure S6.** Two-phase Rietveld refinement of the mixture containing  $\text{Sr}_{2-x}\text{Na}_x\text{MgSi}_2\text{O}_7$  and  $\text{Al}_2\text{O}_3$  phases as internal standard with mass percentages of 50%: (a)  $x = 0$ , (b)  $x = 0.1$ , (c)  $x = 0.2$ , (d)  $x = 0.3$ , (e)  $x = 0.4$ .

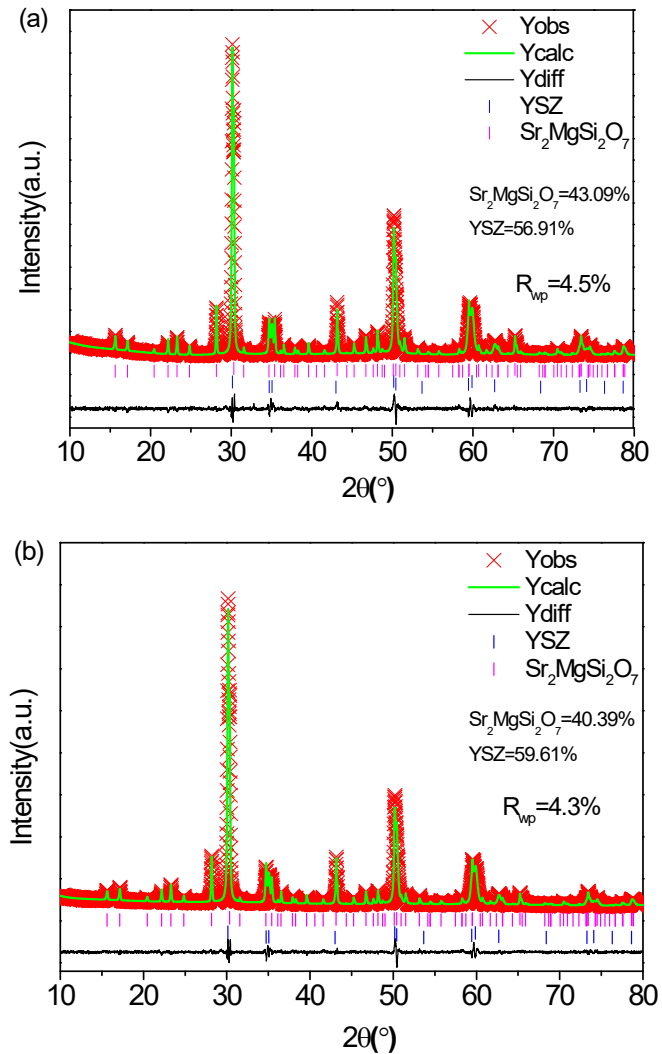

**Figure S7.** Rietveld plots of (a)  $\text{Sr}_2\text{MgSi}_2\text{O}_7$  and (b)  $\text{Sr}_{1.7}\text{Na}_{0.3}\text{MgSi}_2\text{O}_{6.85}$  with YSZ as internal standard. The glassy phase contents from the two-phase Rietveld analysis are 24(1) wt% and 32(1) wt% in  $\text{Sr}_2\text{MgSi}_2\text{O}_7$  and  $\text{Sr}_{1.7}\text{Na}_{0.3}\text{MgSi}_2\text{O}_{6.85}$ , respectively. Although the difference between their glassy phase content 7.9 % is close to that (6.9%) from the analysis using the  $\text{Al}_2\text{O}_3$  standard, the systematic error (24.3 wt%) is even higher than that (16.6 wt%) from the analysis using  $\text{Al}_2\text{O}_3$  as standard.



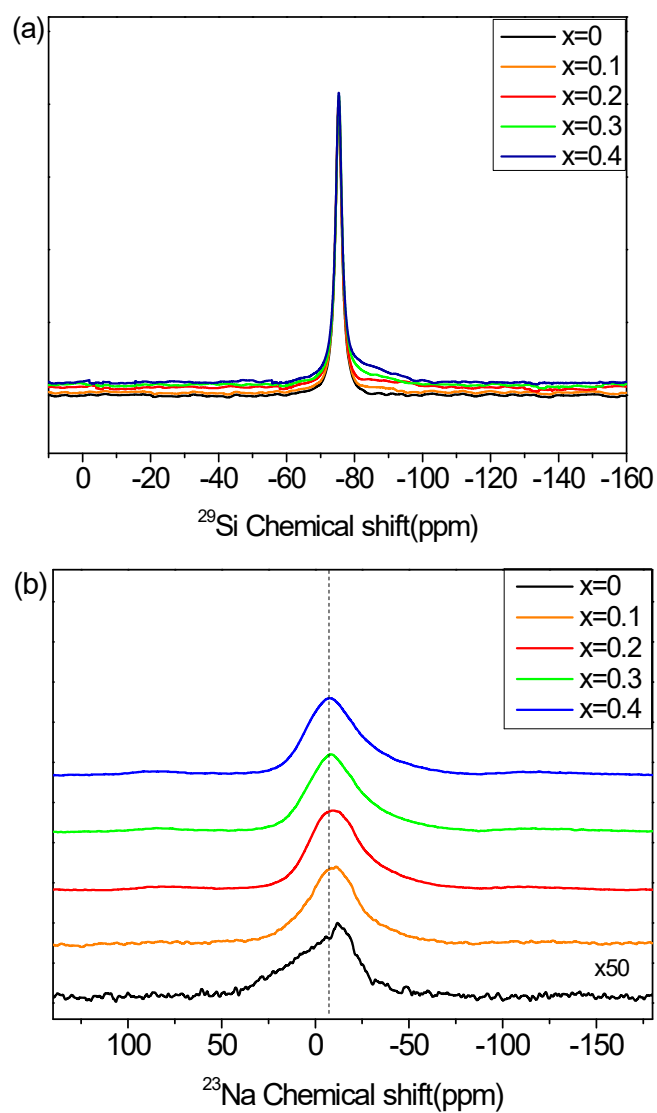

**Figure S8.** (a)  $^{29}\text{Si}$  and (b)  $^{23}\text{Na}$  solid state NMR spectra for the  $x = 0-0.4$  compositions of  $\text{Sr}_{2-x}\text{Na}_x\text{MgSi}_2\text{O}_{7-0.5x}$ .

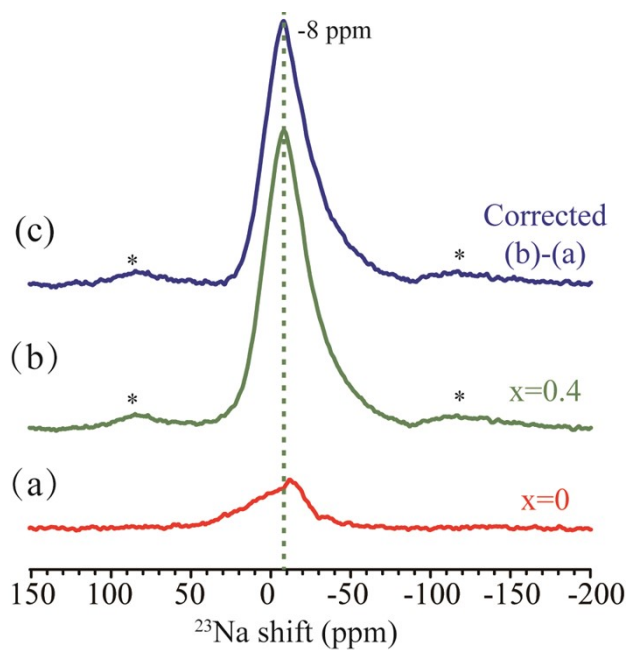

**Figure S9.** The correction of  $^{23}\text{Na}$  NMR spectrum by subtracting (a) the signal of undoped pristine composition from (b) the raw NMR spectra for  $\text{Sr}_{1.6}\text{Na}_{0.4}\text{MgSi}_2\text{O}_{6.8}$ . (c) is the corrected spectrum.

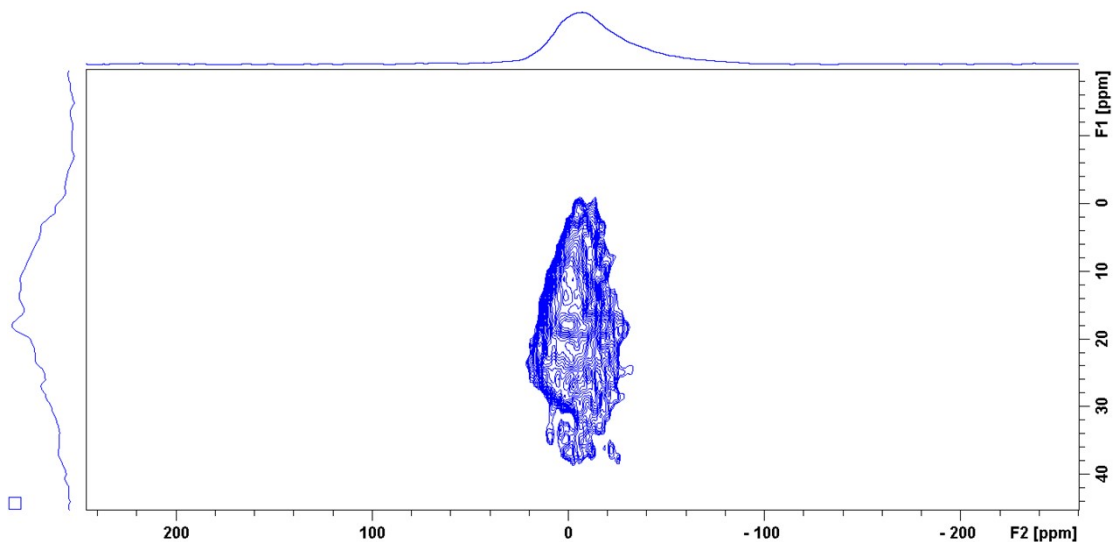

**Figure S10.** Two dimensional  $^{23}\text{Na}$  MQMAS NMR spectrum of  $\text{Sr}_{1.6}\text{Na}_{0.4}\text{MgSi}_2\text{O}_{6.8}$ .

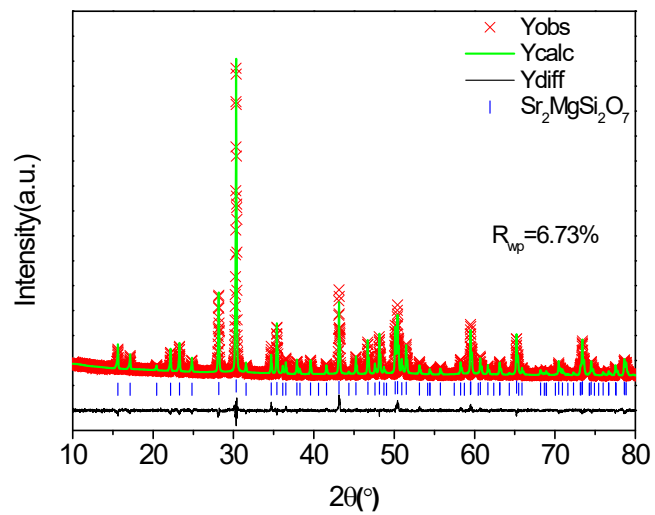

**Figure S11.** Rietveld refinement of the XRD data for the  $\text{Sr}_{1.6}\text{Na}_{0.4}\text{MgSi}_2\text{O}_{6.8}$  sample at 1000 °C.
